# Supplementary material for: Validation of targeted next-generation sequencing for RAS mutation detection in FFPE colorectal cancer tissues: comparison with Sanger sequencing and ARMS-Scorpion real-time PCR
Source: HighWire-hosted journal article supplement (doi:10.1136/bmjopen-2015-009532), 2016-01-01

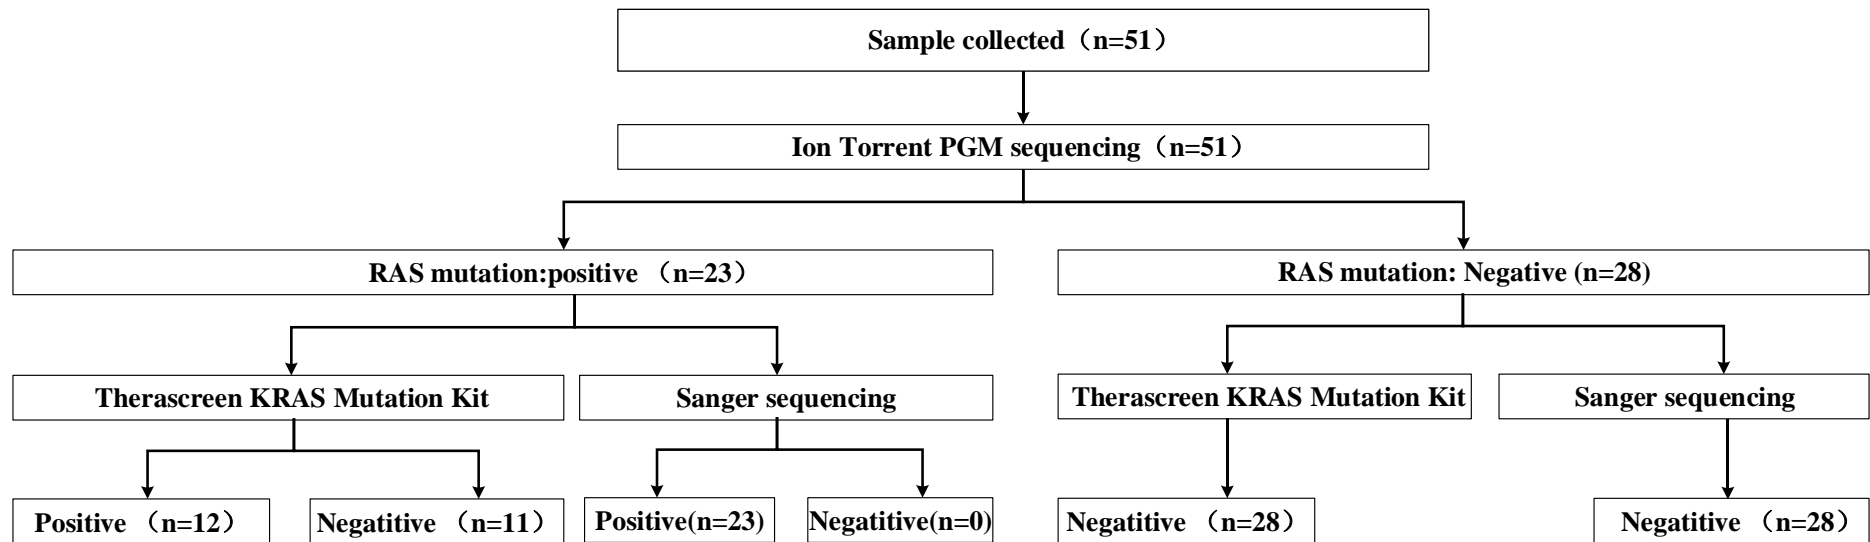

Supplement: bmjopen-2015-009532supp.pdf [file bmjopen-2015-009532supp.pdf]
